# Supplementary material for: Clean preparation of nanoparticulate metals in porous supports: a supercritical routeElectronic supplementary information (ESI) available: synthesis of precursor complexes; preparation of aerogels. See http://www.rsc.org/suppdata/jm/b1/b111111f/.
Source: Royal Society of Chemistry journal article supplement (doi:10.1039/b111111f), 2002-04-25
Supplement: b111111f.doc [file b111111f.doc]

**Supplementary data**

**Synthesis of Precursor Complexes.**

**[1]Ag(hfpd)2(OH2)2.**

To a slurry of silver (I) oxide (2.78g, 12.0mmol) in THF (*ca*. 40ml), H-hfpd (3.4ml, 24.0mmol) was added drop wise with vigorous stirring and left for 1 hour until the dissolution of Ag2O was complete. The solution was filtered and the solvent removed *in vacuo* to yield a white precipitate. The crude product was purified by dissolution into minimum amount of hot THF and allowed to crystallise at 4C, yielding colourless square crystals. (6.245g, 80.3%, m.p. 146-148°C.)

Analysis calculated for (C10H6AgF12O6): Expected (Found) C 21.53% (23.64%) H 1.15% (1.21%). 1H NMR (300.13MHz, DMSO, 300K): = 5.35 (s, 2H, CH), 3.70 (s, 2H, OH2), ppm. 19F NMR (282.4MHz, DMSO, 300K): = -71.14 (CF3). IR (Nujol Mull)(/cm-1) (s=strong, m=medium, w=weak): 2914.5s, 166.3s, 1631.3s, 1603.2s, 1558.4s, 1501.7s 1460.1s, 1376.9m, 1326.3m, 1264.4s. FAB Positive ion mass spectrum (NBA): *m/z* 563 {[Ag(hfac)2(OH2)2]+, 12.7} 538 {[Ag(hfac)2OH2]+, 24.6} 519 {[Ag(hfac)2]+, 11.2} 413 {[Ag(OC(CF2)CHC(CF2)O)2]+, 62} 347 {[Ag(OH2)2(hfac)]+, 100} 260 {[Ag(OC(CF2H)CHC(CFH2)O]+, 58.79} 136 {HFCCOCH2COCFH]+, 30.1} 108 {[Ag]+, 95%}

**[A] Ag(hfpd)(tetraamine)**

To a solution of the homoleptic [1], (6.245g, 12.0mmol), in THF, (*ca*. 40ml), at 0C 1,1,4,7,10,10-hexamethyltriethylene tetraamine, (2.76g, 12.0mmol), was added drop wise. The solution was stirred vigorously for 1 hour until the dissolution of Ag2O was complete. The solution was filtered and the solvent removed *in vacuo* to yield a yellow precipitate. The crude product was recrystallised from a THF solution, layered with pentane at –20C to yield yellow needle-like crystals. (10.37g, 83.9%, 76-78°C.)

Analysis calculated for (C17H31AgF6N4O2): Expected (Found) C 37.51% (37.39%), H 5.56% (5.67%), N 10.29% (10.21%).

1H NMR (300.13MHz, DMSO, 300K): = 5.24 (s, 1H, CH), 2.50 (m, 12H, (CH3)2(NCH2)2(CH3)(CH2)2N(CH3)(CH2)2N(CH3)2), 2.47 (s, 12H, (CH3)2(NCH2)2(CH3)(CH2)2N(CH3)(CH2)2N(CH3)2), 2.35 (s, 6H, (CH3)2(NCH2)2(CH3)(CH2)2N(CH3)(CH2)2N(CH3)2),ppm. 13C NMR (75.15MHz, DMSO, 300K): = 173.6 (q, CO), 118.3 (q, CF3), 84.3 (s, CH), 58.9 (s, CH2), 55.7 (s, CH2) 48.3 (s, N(CH3)2), 43.9 (s, NCH3) ppm. 19F NMR (282.4MHz, DMSO, 300K): = -76.11 (CF3). IR (Nujol Mull)(/cm-1)(s=strong, m=medium, w=weak): 2922.7s, 2853.0s, 1664.0s, 1543.4s, 1526.9s, 1461.9s, 1377.0m, 1313.3m, 1244.4s. FAB Positive ion mass spectrum (NBA): *m/z*

340{[Ag(CH3)2NCH2CH2N(CH3)CH2CH2N(CH3)CH2CH2N(CH3)2]2+, 13} 339{[Ag(CH3)2NCH2CH2N(CH3)CH2CH2N(CH3)CH2CH2N(CH3)2)]+, 92} 338{[Ag(CH3)2NCH2CH2N(CH3)CH2CH2N(CH3)CH2CH2N(CH2)(CH3)]+,16}

337{[Ag(CH3)2NCH2CH2N(CH3)CH2CH2N(CH3)CH2CH2N(CH2)2]+, 100} 229{[CH3)2NCH2CH2N(CH3)CH2CH2N(CH3)CH2CH2N(CH3)2]+, 7} 115{[CH3)2NCH2CH2NCH3)2]+, 5} 72{[(CH3)2NCH2CH3)]+, 23} 58{[N(CH3)3]+, 14%}

**[B] Ag(hfpd)(tetraglyme)**

To a slurry of silver (I) oxide, (2.78g,12.0mmol) and tetraethylene glycol dimethyl ether (5.33g, 24.0mmol) in THF (*ca*. 40ml), H-hfpd (3.40ml,24.0mmol) was added drop wise with vigorous stirring and left for 1 hour until the dissolution of Ag2O was complete. The solution was filtered and the solvent removed *in vacuo* to yield an off white precipitate. The crude product was recrystallised from a THF solution layered with pentane, (*ca*. 20ml), at –20C to yield colourless square-shaped crystals. (8.76g, 67.4%, m.p. 46-48°C)

Analysis calculated for (C15H23AgF6O6): Expected (Found) C 33.54% (33.50%), H 4.32% (4.10%). 1H NMR (300.13MHz, DMSO, 300K): = 5.29 (s, CH), 3.53 (m, 8H, CH3OCH2CH2OCH2CH2O-) 3.48 (m, 4H, CH3OCH2CH2OCH2CH2O-) 3.42 (m, 4H, CH3OCH2CH2OCH2CH2O-) 3.24 (s, 6H, CH3) ppm. 13C NMR (71.15MHz, DMSO, 298K): = 83.3 (CH3), 71.8 (CH2), 70.3 (CH2), 70.1 (CH2), 58.6 (CH3) ppm. 19F NMR (282.40MHz, DMSO, 300K): = -76.11 (CF3) ppm. IR (Nujol Mull)(/cm-1)(s=strong, m=medium, w=weak): 2857.4s, 1663.2m, 1524.9m, 1463.6m, 1376.7m, 1357.3m, 1253.2m, 1191.3w, 1169.5w, 1169.48w, 1149.5w, 1095.3w, 1026.7m, 942.4m. FAB Positive ion mass spectrum (NBA): *m/z* 331{[Ag(CH3OCH2CH2OCH2CH2OCH2CH2OCH2CH2OCH3)]+, 91} 329{[Ag(CH2OCH2CH2OCH2CH2OCH2CH2OCH2CH2OCH2)]+, 100} 245{[Ag(hfpd)]+ –CF3, 55} 109{[Ag]+, 15} 107{[CF2COCH2CH3)]+, 17}

59{[HOCH2CH2CH3]+, 17%}

# Preparation of Aerogels

A solution of hydrochloric acid (1M, 6 drops) in ethanol (7.7 g, 0.17 mol) and water (5.6 g, 0.31 mol) was added drop wise to a mixture of *N,N*-dimethylacetamide (10.88 g, 0.13 mol) and tetraethoxysilane (5.20 g, 0.25 mol). The mixture was stirred for 1 hour at room temperature (TEOS : EtOH : H2O : DMA = 1 : 0.7 : 1.25 : 0.5). A solution of ammonium hydroxide (6 drops) in ethanol (7.7 g, 0.17 mol) and water (5.6 g, 0.31 mol) was added, and the mixture stirred for a further 20 min at room temperature.

The gels were aged and dried under identical conditions. After synthesis as described, the samples were held in an oven at 30 C for 18 hr before being stored at room temperature for seven days. After this time, the alcogels were removed from their beakers, broken into cubes of width *ca.* 2 cm and stored under methanol. The aerogel synthesis was completed by an scCO2-drying step. The alcogel sample was placed in a stainless steel autoclave (10 ml, Thar Designs), and the autoclave filled with methanol. The cell was purged with CO2 for 2 hr at 1500 psi and 20 C and for a further 20 hr at 1500 psi and 30 C. The pressure in the cell was then released over a period of *ca.* 30 min until atmospheric pressure was reached. The sample was removed from the autoclave and placed in an oven at 30 C for 48 hr.
